# Supplementary material for: In vivo imaging reveals mitophagy independence in the maintenance of axonal mitochondria during normal aging
Source: PubMed Central journal article supplement (PMC5595681; doi:10.1111/acel.12654), 2017-08-07
Supplement: ACEL-16-1180-s001.pdf [file ACEL-16-1180-s001.pdf]

1 **SUPPLEMENTAL INFORMATION**

2

3

4 ***In vivo* imaging reveals mitophagy independence in the maintenance**  
5 **of axonal mitochondria during normal aging**

6

7 Xu Cao, Haiqiong Wang, Zhao Wang, Qingyao Wang, Shuang Zhang, Yuanping

8 Deng and Yanshan Fang

**Figure S1**

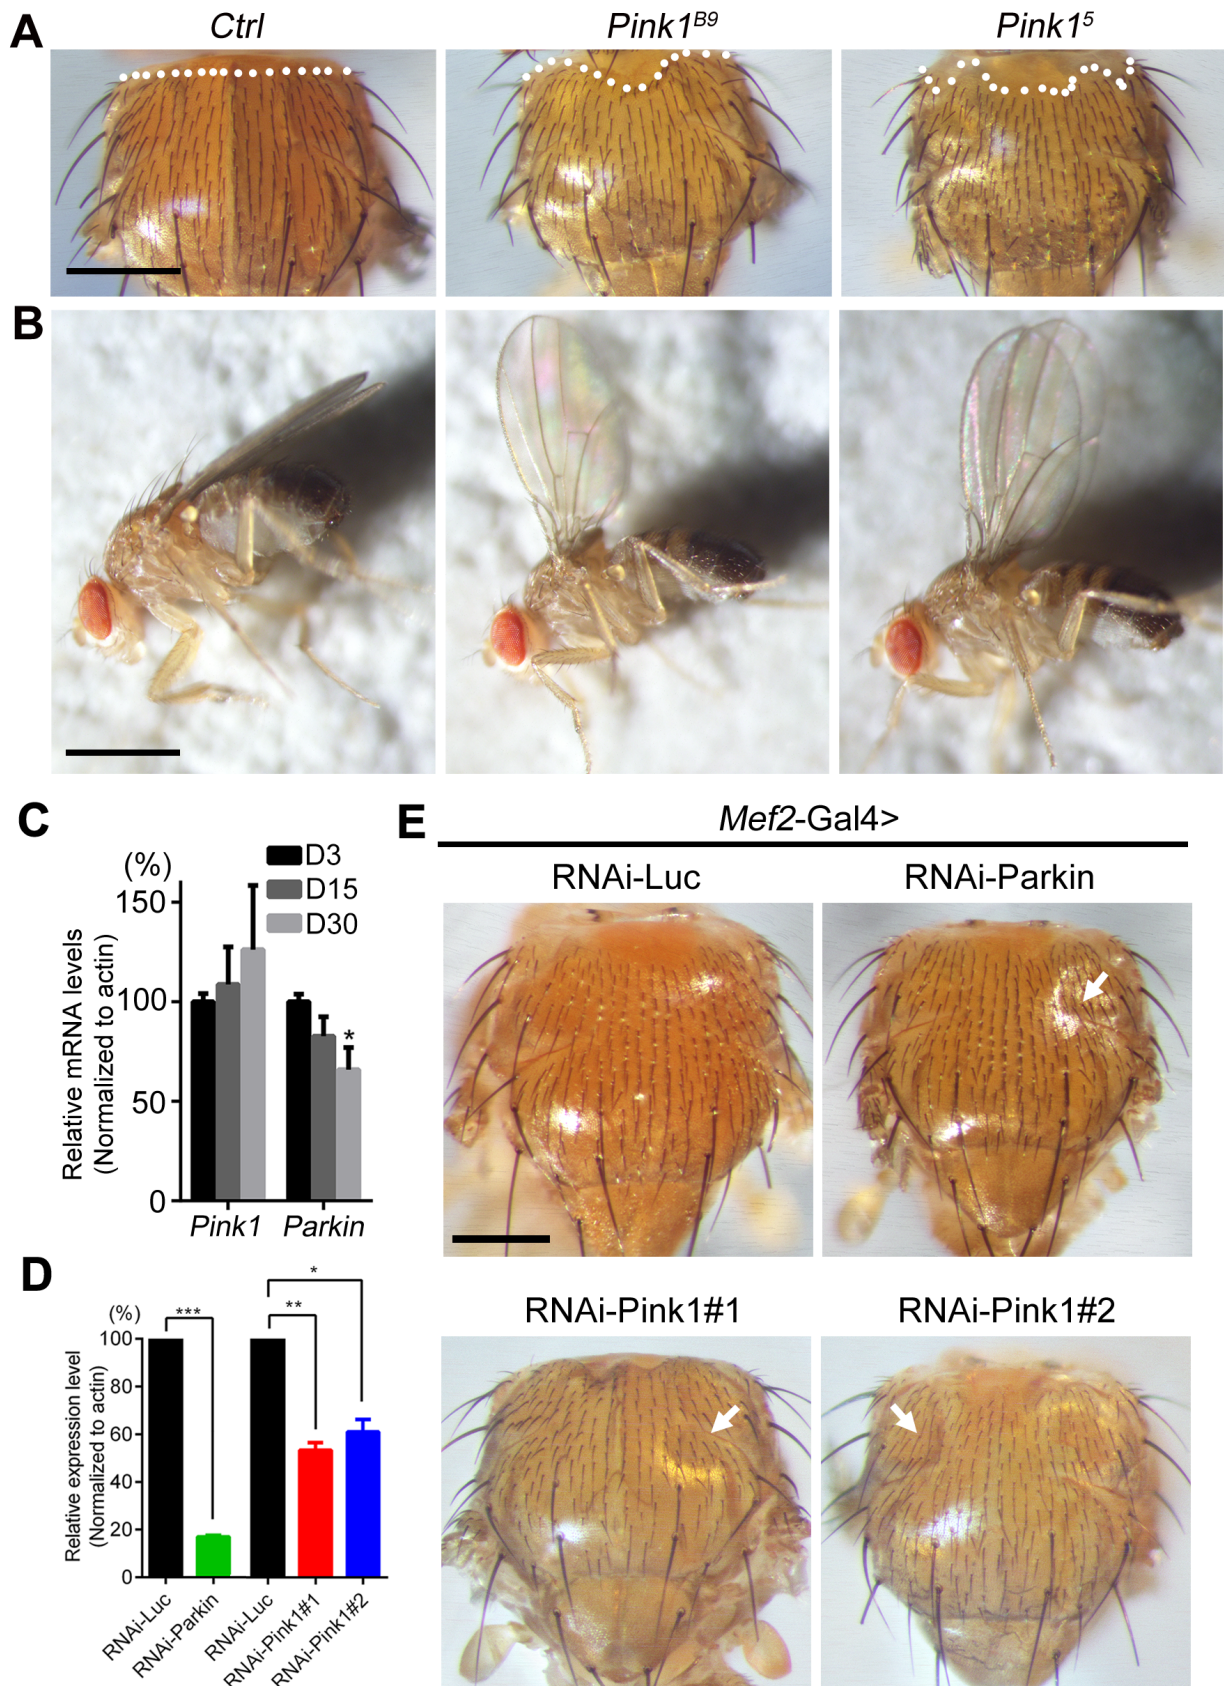

**10 Figure S1. Disruption of the PINK1-Parkin pathway leads to overt abnormal muscle phenotypes.**

11 (A) Representative images of the thorax of the control (*w<sup>1118</sup>*), *Pink1<sup>B9</sup>* and *Pink1<sup>5</sup>* flies. The *Pink1* mutant  
12 flies have an apparent crushed thorax phenotype, as outlined by the white dashed lines. (B) Both *Pink1<sup>B9</sup>*  
13 and *Pink1<sup>5</sup>* mutant flies show held-up wings compared to control flies. The muscle degenerative  
14 phenotypes are consistent with the previous reports of the *Pink1* mutants (Clark, et al., 2006; Park et al.,  
15 2006). (C) The relative mRNA levels of *Pink1* and *Parkin* in the fly head at the indicated time points are  
16 analyzed by qPCR and normalized to actin. The expression of *Parkin* is significantly reduced at D30. (D)  
17 The knockdown efficiency of RNAi-*Parkin* and two independent transgenic lines of RNAi-*Pink1* is  
18 determined by qPCR. Data are shown as mean  $\pm$  SEM. \**p* < 0.05, \*\**p* < 0.01, \*\*\**p* < 0.001. (E)  
19 Downregulation of *Parkin* or *Pink1* in muscles (*Mef2-Gal4*) using the same RNAi transgenic strains of  
20 the neuronal manipulations (see Fig. 2E-2H) causes muscle degenerative phenotypes including collapsed  
21 thorax (arrow), which is consistent with previous reports of the LOF mutants of *Parkin* (Greene et al.,  
22 2003; Cha et al., 2005) and *Pink1* (Clark, et al., 2006; Park et al., 2006). Scale bars, 500  $\mu$ m in (A and E)  
23 and 1 mm in (B).

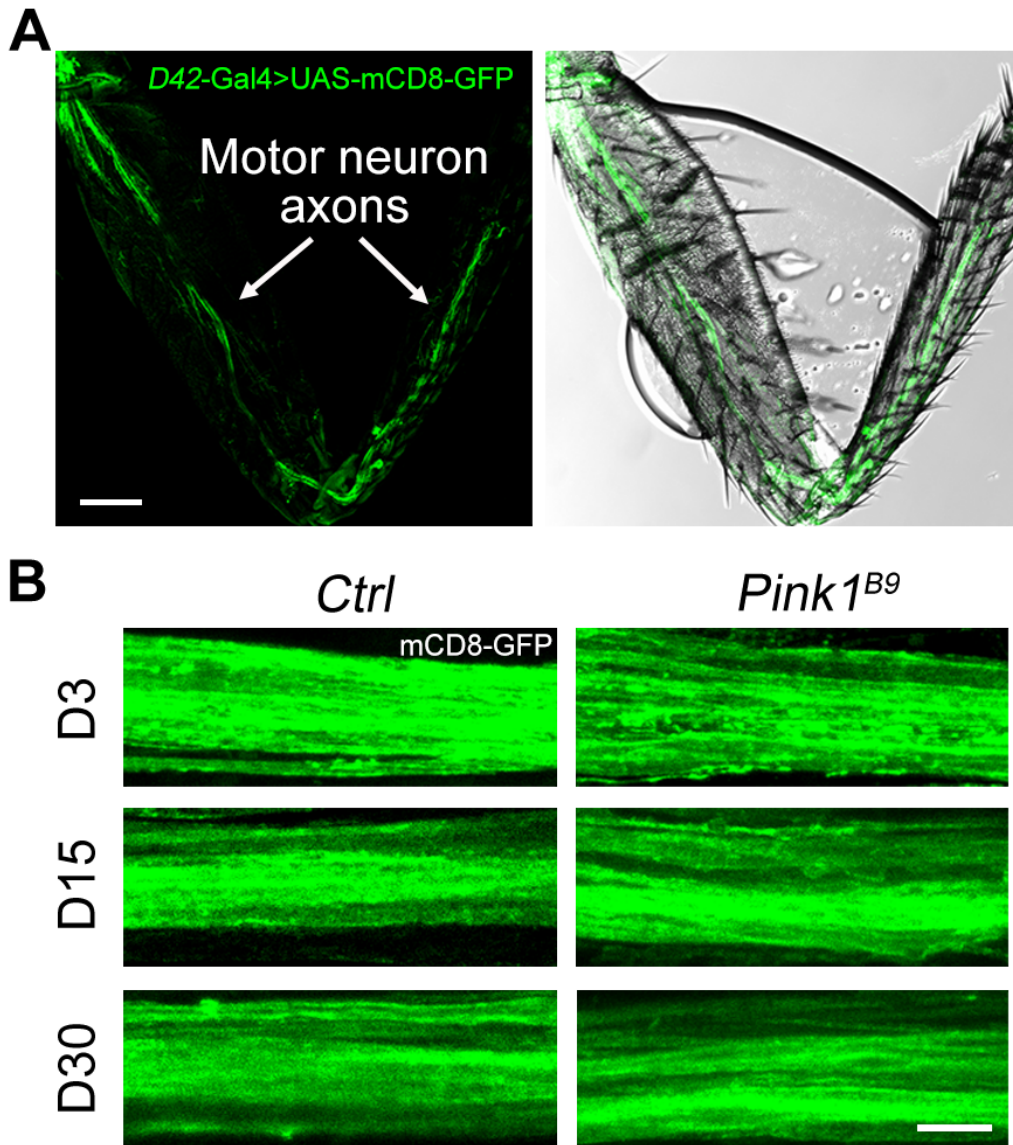

24 **Figure S2. The PINK1-Parkin pathway is also dispensable in *Drosophila* motor neurons**

25 (A) Representative images of motor neuron axons labeled by mCD8-GFP (left) using a *D42-Gal4* driver  
 26 in the fly leg (right, merged with bright field). (B) Motor neuron axons of control (*w<sup>1118</sup>*) and *Pink1<sup>B9</sup>* at  
 27 D3, D15 and D30. Similar to sensory neurons in the wing nerve (Fig. 2D), no axonal degeneration is  
 28 observed in the LOF mutants of *Pink1*. Scale bars, 50  $\mu$ m in (A) and 5  $\mu$ m in (B).

**Figure S3**

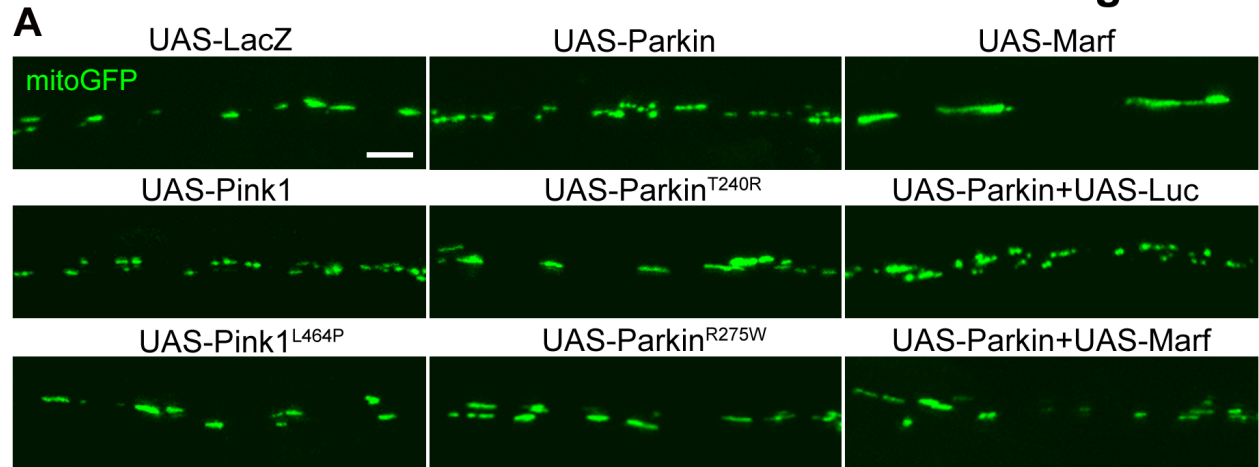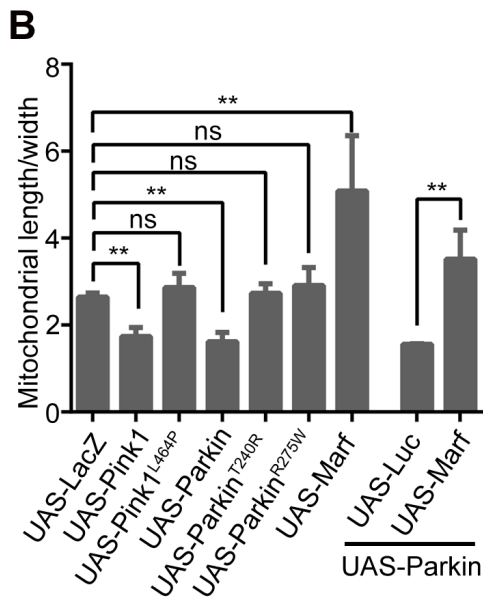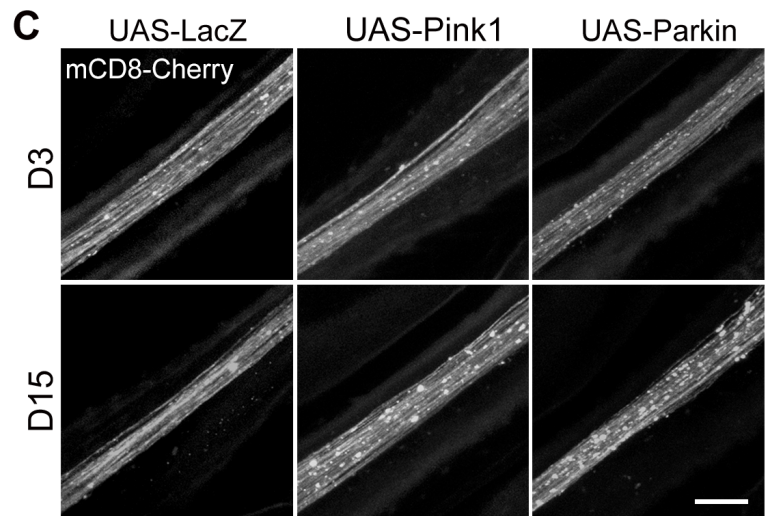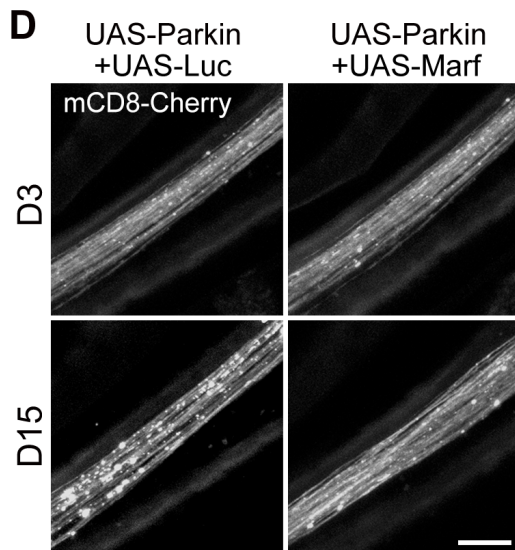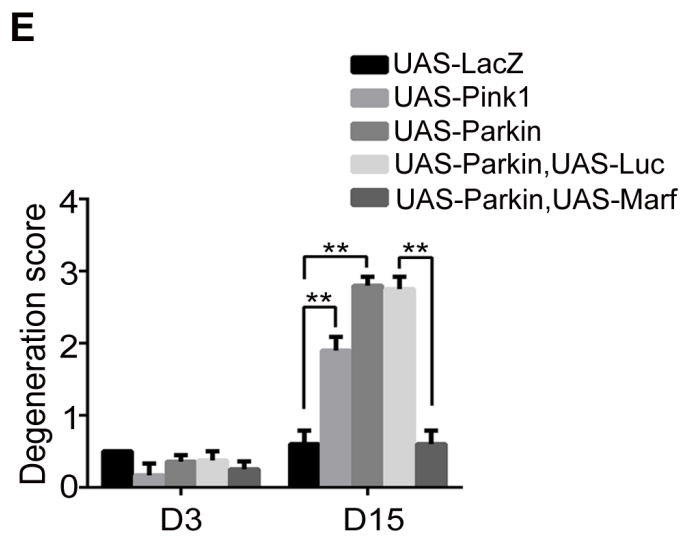

**30 Figure S3. Upregulation of the PINK1-Parkin pathway is detrimental to axons *in vivo*.**

31 (A) Axonal mitochondria in the costal wing nerve of the indicated genotypes. The mitochondrial  
32 length/width ratio is quantified in (B). Data are shown as mean  $\pm$  SEM, n = 7~10 wings per group. \*\*\* $p$  <  
33 0.001. (C-D) Representative *in vivo* images of mCD8-mCherry labeled L1 wing nerve of indicated  
34 genotypes at D3 and D15. (E) Quantification of the axonal degeneration scores of (C) and (D) as  
35 described in the Methods. Data are shown as mean  $\pm$  SEM, n = 6~8 wings per group. Scale bars, 5  $\mu$ m in  
36 (A) and 10  $\mu$ m in (C-D). Overexpression of *Pink1* or *Parkin* in the wing axons led to shortened  
37 mitochondria, while upregulation of the mitochondrial fusion gene *Marf* increased mitochondrial length.  
38 The transgenic expression of catalytically inactive *Pink1* mutants, *Pink1*<sup>L464P</sup> (Song et al., 2013), and  
39 *Parkin* mutants, *Parkin*<sup>T240R</sup> or *Parkin*<sup>R275W</sup> (Lee et al., 2010; Kim et al., 2013), using the same Gal4 driver  
40 did not significantly alter the mitochondrial morphology in axons, suggesting that the mitochondrial  
41 fragmentation and detrimental effects of overexpressing *Pink1* or *Parkin* require their enzymatic activity  
42 in this context. In addition, both mitochondrial morphology and axonal integrity of the  
43 *Parkin*-overexpressing flies are improved by co-expression of the mitochondrial fusion gene *Marf*.

**Figure S4**

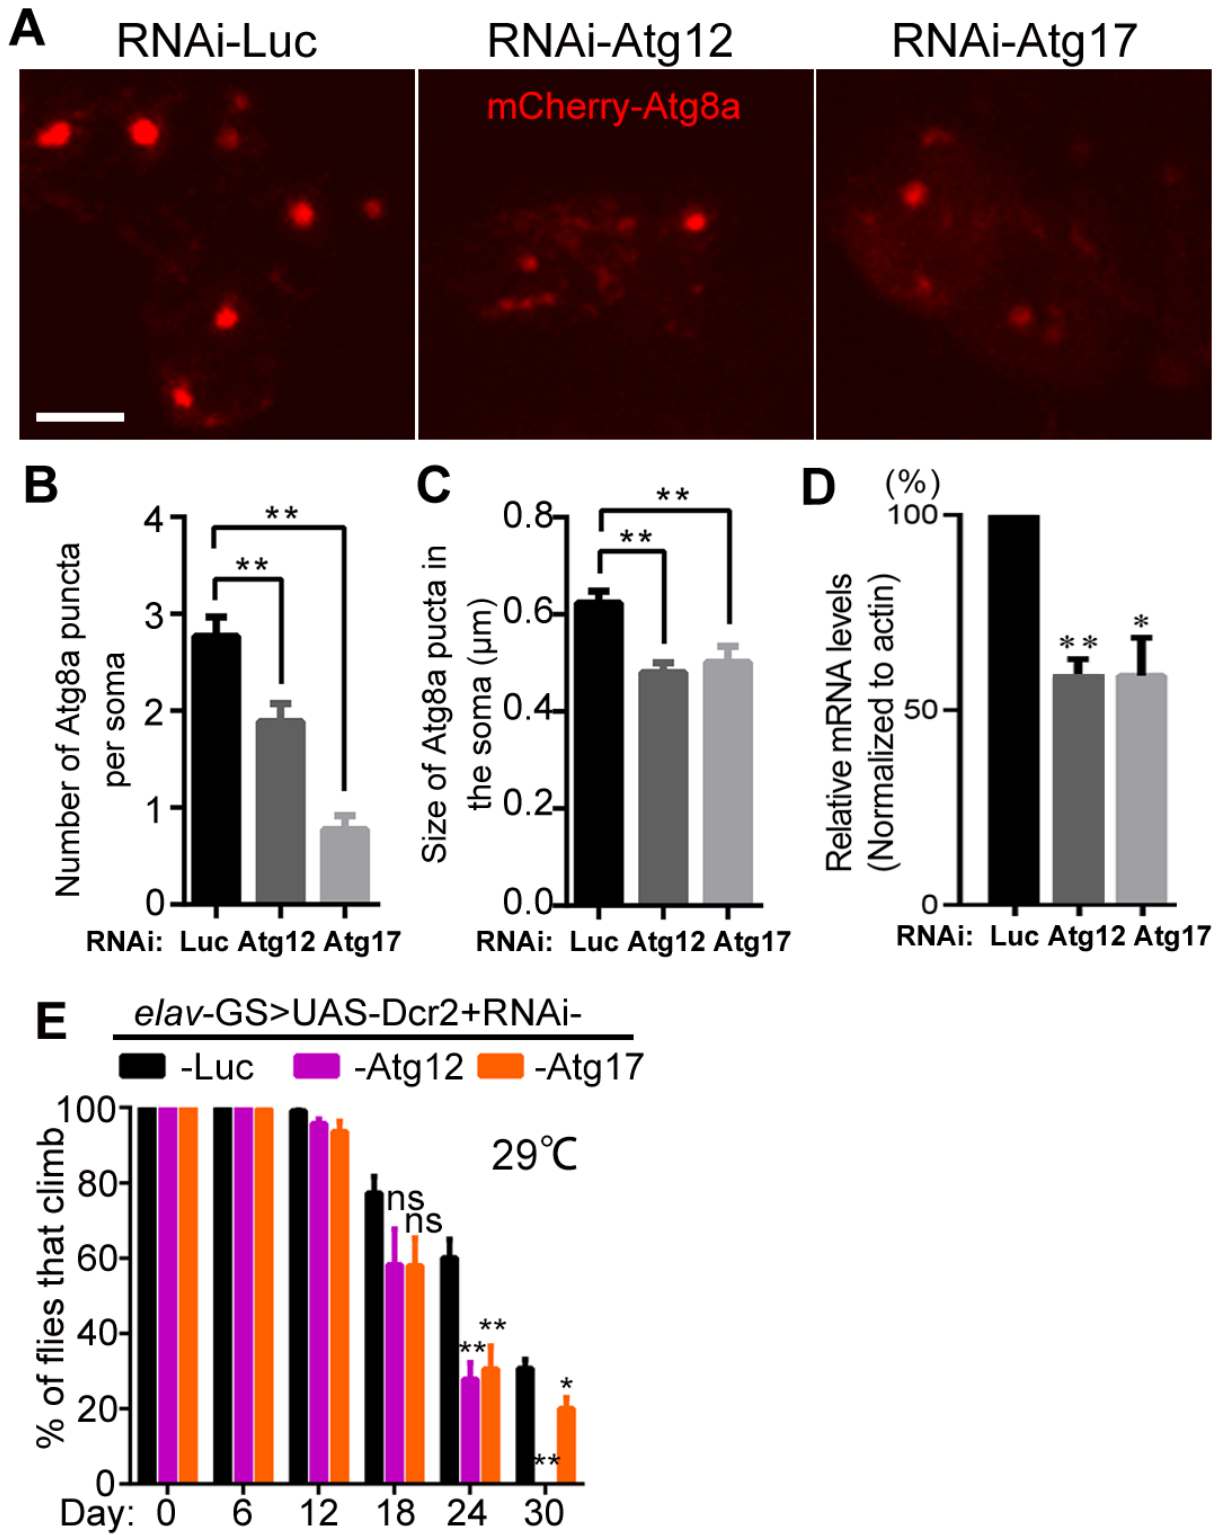

45 **Figure S4. The core ATG genes *Atg12* and *Atg17* are required for neuronal autophagy.**

46 (A) The neuronal soma of the wing nerve show autophagosomes labeled by mCherry-Atg8a of indicated  
47 genotypes at D3. Scale bar, 2.5  $\mu\text{m}$ . (B-C) The number and the size of mCherry-Atg8a puncta in the  
48 neuronal soma are determined using the “analyze particle” tool of ImageJ and quantified in (B) and (C),  
49 respectively. Data are shown as mean  $\pm$  SEM, n = 11~14 wings per group. (D) The knockdown efficiency  
50 of RNAi-*Atg12* and RNAi-*Atg17* is determined by qPCR. n = 20 flies per vial and 6-7 vials group. (E)  
51 Climbing assays of flies of indicated genotypes aged at 29 °C. The locomotive ability is assessed as the  
52 average percentage of flies climbing over a distance of 5 cm within 15 seconds. Data are shown as mean  
53  $\pm$  SEM, n = 20 flies per vial and 6-8 vials each group. \* $p < 0.05$  \*\* $p < 0.01$ . ns, not significant. Compared  
54 to the RNAi-*luc* controls, the RNAi-*Atg12* and RNA-*Atg17* flies under heat stress showed dramatically  
55 accelerated decline of climbing ability at ages D24 and D30.



---

## 56 SUPPLEMENTAL EXPERIMENTAL PROCEDURES

### 57 Generation of Transgenic *Drosophila* Strains

58 Six tandem *c-myc* epitopes were amplified by routine PCR and subcloned into the pBID-UASC  
59 vector (Wang et al., 2012) between the KpnI and XbaI sites using ClonExpress<sup>TM</sup> II One Step Cloning Kit  
60 (Vazyme). The coding sequence of *Drosophila Marf* (RE04414) was retrieved from cDNA clones from  
61 the *Drosophila* Genomics Resource Center (DGRC) and sub-cloned into pBID-UASC-6\*myc between the  
62 EcoRI and XhoI sites. The transgenic fly strain of pBID-UAS-*Marf* (together with  
63 pBID-UASC-*Luciferase* as a control) was generated by  $\Phi$ C31 integrase-mediated, site-specific  
64 integration into the fly genome, which allowed uniform transgene expression across different lines. The  
65 attP landing site stock used in this study was UAS-phi2b2a; VK5 (75B1).

66

### 67 Wing Nerve Imaging Procedure

68 The *Drosophila* wing nerve labeled by various fluorescent protein markers was visualized on live flies  
69 under a Leica DM6000B fluorescent microscope as described previously (Fang et al., 2013). In order to  
70 use a Leica TCS SP8 confocal microscope to obtain images of better quality for publication, wings were  
71 detached from the fly body and briefly washed with PBST (0.2% Triton-X-100, to eliminate  
72 hydrophobicity of the wing cuticle). Rinsed wings were mounted directly in Vectashield Mounting  
73 Medium (Vector Laboratories) and imaged immediately. Similar imaging settings were applied for  
74 comparison across different groups.

75

### 76 Imaging Acquisition, Processing and Analysis

77 Neuronal mitochondria and autophagosomes were labeled by mitoGFP and mCherry-Atg8a, respectively.  
78 Images were taken with a confocal microscope (Leica TCS SP8) using a 63X oil objective (NA=1.4). The  
79 images were processed and analyzed in LAS X and ImageJ, and assembled into figures using Adobe  
80 Photoshop CS6 with similar settings. The outline of the Costal or the L1 nerve in each image was drawn  
81 as a region of interest (ROI). The signal of mitochondria or autophagosomes in the ROI was defined and  
82 the threshold was adjusted to make the machine-identified mitochondria or autophagosome match the

83 actual morphology in the image. The size and number of mitochondria or autophagosomes were measured  
84 using the “Analyze Particles” feature of ImageJ, and their colocalization was determined using the  
85 “Colocalization Highlighter” plugin of ImageJ. The axonal integrity was imaged using mCD8-mCherry as  
86 a marker and quantified as previously described (Fang et al., 2012). Briefly, in intact axons, the  
87 mCD8-Cherry signal appeared mostly smooth and continuous (degeneration score 0). With degeneration,  
88 the axonal mCD8-Cherry became blobby (degeneration score 1), fragmented (degeneration score 2),  
89 completely broken (degeneration score 3), and eventually lost fluorescent signal (degeneration score 4).  
90 The numbers of wings quantified in each experiment were specified in the figure legends.

91

### 92 **Quantitative Reverse Transcription (RT)-PCR (qPCR)**

93 The knockdown efficiency of the RNAi lines was determined by extracting total RNA from the whole fly  
94 or the fly head of 7-day old adult flies, followed by qPCR assays. A pan-neuronal *elav*-Gal4 driver was  
95 used to drive the expression of the UAS-RNAi transgene in all neurons including the wing nerve. For  
96 lines that pan-neuronal expression caused early lethality, an eye-specific driver GMR-Gal4 was used and  
97 the RNA was extracted from the fly heads only. UAS-RNAi-luc was used as a control with the *elav*-Gal4  
98 or GMR-Gal4 driver, respectively. Approximately 30 flies were collected for each test and 3 biological  
99 repeats were performed for the statistical analysis. For qPCR, total RNA was isolated from whole flies or  
100 fly heads using TRIzol (Invitrogen) according to the manufacturer’s instruction. After DNase (Promega)  
101 treatment to remove genomic DNA, RT reactions were performed using High-Capacity cDNA Reverse  
102 Transcription kit (Applied Biosystems) with random primers. The cDNA was then used for real-time PCR  
103 with SYBR Select Master Mix (Applied Biosystems) by QuantStudio™ 6 Flex Real-Time PCR system  
104 (Life Technologies). *actin* was used as an internal reference to normalize the mRNA levels of genes of  
105 interest. The following qPCR primers were used:

106 *actin* forward: 5’---GAGCGCGGTTACTCTTTCAC---3’

107 *actin* reverse: 5’---GCCATCTCCTGCTCAAAGTC---3’

108 *Pink1* forward: 5’---CAGGAACAAGAGCAGCATCA---3’

109 *Pink1* reverse: 5’---AGAGCGTTGCTCTGGATGTC---3’

110 *Parkin* forward: 5'--- TTGTACGCAAAATGCTGGAG ---3'  
111 *Parkin* reverse: 5'--- GTGCCACCAGTTCCTTTACG ---3'  
112 *Atg12* forward: 5'---CAGCGAGCAAATTTTCCTGT---3'  
113 *Atg12* reverse: 5'--- CACGCCTGATTCTTGCAGTA---3'  
114 *Atg17* forward: 5'--- GAGCTCAGCCAGGAGAAGAG---3'  
115 *Atg17* reverse: 5'--- CATCCTTCCAAGGCGATAGA---3'  
116 *Marf* forward: 5'--- GTCCATGAGACGACCACCTT---3'  
117 *Marf* reverse: 5'--- GAAGGCCACCTTCATGTGAT---3'  
118 *Opal* forward: 5'--- TGGTAAAACCGTCAGCAATG ---3'  
119 *Opal* reverse: 5'--- TTGGTCATCTGGTGAATGGA ---3'  
120 *Drp1* forward: 5'--- ACCCTGGACTCCATTCACC ---3'  
121 *Drp1* reverse: 5'--- GAATCTGGCGCTTCACTAGC ---3'

122

### 123 **Lifespan and Climbing Assays**

124 For lifespan experiments, 20 flies per vial, 8-11 vials per group were tested. Flies were transferred to fresh  
125 fly food every 3 days. Flies lost prior to natural death through escape or accidental death were excluded  
126 from the final analysis. The median lifespan was calculated as the mean of the medians of each vial of the  
127 same group, whereas the “50% survival” shown on the survival curves was derived from compilation of  
128 all vials of the group. Thus, there was sometimes a slight difference from these two calculations but the  
129 conclusions were not affected. For the climbing assays, 20 flies were transferred into an empty  
130 polystyrene vial and gently tapped down to the bottom of the vial. The number of flies that climbed over a  
131 distance of 5 cm within 15 seconds was recorded. The test was repeated three times for each vial and 6~8  
132 vials per group were tested. For adult-onset, neuronal expression of the RNAi transgenes using the  
133 *elav*-GS driver (Osterwalder et al., 2001), flies were raised at 25 °C and 60% relative humidity on regular  
134 fly food supplemented with 80 µg/ml RU486 (TCI).

135 **SUPPLEMENTAL REFERENCES**

- 136 Cha, G.H., Kim, S., Park, J., Lee, E., Kim, M., Lee, S.B., Kim, J.M., Chung, J., and Cho, K.S. (2005).  
137 Parkin negatively regulates JNK pathway in the dopaminergic neurons of *Drosophila*. Proc. Natl Acad.  
138 Sci. USA *102*, 10345-10350.
- 139 Clark, I.E., Dodson, M.W., Jiang, C., Cao, J.H., Huh, J.R., Seol, J.H., Yoo, S.J., Hay, B.A., and Guo, M.  
140 (2006). *Drosophila pink1* is required for mitochondrial function and interacts genetically with parkin.  
141 Nature *441*, 1162-1166.
- 142 Fang Y, Soares L, Teng X, Geary M, Bonini NM (2012) A novel *Drosophila* model of nerve injury  
143 reveals an essential role of Nmnat in maintaining axonal integrity. Curr. Biol. *22*, 590-595.
- 144 Fang Y, Soares L, Bonini NM (2013) Design and implementation of in vivo imaging of neural injury  
145 responses in the adult *Drosophila* wing. Nat. Protoc. *8*, 810-819.
- 146 Greene, J.C., Whitworth, A.J., Kuo, I., Andrews, L.A., Feany, M.B., and Pallanck, L.J. (2003).  
147 Mitochondrial pathology and apoptotic muscle degeneration in *Drosophila* parkin mutants. Proc. Natl  
148 Acad. Sci. USA *100*, 4078-4083.
- 149 Kim, N.C., Tresse, E., Kolaitis, R.M., Molliex, A., Thomas, R.E., Alami, N.H., Wang, B., Joshi, A.,  
150 Smith, R.B., Ritson, G.P., et al. (2013). VCP is essential for mitochondrial quality control by  
151 PINK1/Parkin and this function is impaired by VCP mutations. Neuron *78*, 65-80.
- 152 Lee, J.Y., Nagano, Y., Taylor, J.P., Lim, K.L., and Yao, T.P. (2010). Disease-causing mutations in parkin  
153 impair mitochondrial ubiquitination, aggregation, and HDAC6-dependent mitophagy. J. Cell Biol. *189*,  
154 671-679.
- 155 Osterwalder T, Yoon KS, White BH, Keshishian H (2001) A conditional tissue-specific transgene  
156 expression system using inducible GAL4. Proc. Natl Acad. Sci. USA *98*, 12596-12601.
- 157 Park, J., Lee, S.B., Lee, S., Kim, Y., Song, S., Kim, S., Bae, E., Kim, J., Shong, M., Kim, J.M., et al.  
158 (2006). Mitochondrial dysfunction in *Drosophila* PINK1 mutants is complemented by parkin. Nature  
159 *441*, 1157-1161.
- 160 Song, S., Jang, S., Park, J., Bang, S., Choi, S., Kwon, K.Y., Zhuang, X., Kim, E., and Chung, J. (2013).  
161 Characterization of PINK1 (PTEN-induced putative kinase 1) mutations associated with Parkinson

- 162 disease in mammalian cells and *Drosophila*. *J. Biol. Chem.* 288, 5660-5672.
- 163 Wang JW, Beck ES, McCabe, B.D (2012) A modular toolset for recombination transgenesis and
- 164 neurogenetic analysis of *Drosophila*. *PloS ONE* 7:e42102.
